# Supplementary material
Source: publisher figshare collection journal article supplement (https://frontiersin.figshare.com/ndownloader/files/21725247)
Supplement: Supplementary file [file 21725247]

## COHORTS

Newly diagnosed RA  
patients (N=11)

MTX treated RA  
patients (N=18)

Controls (N=9)

## CELL TYPES

CD4<sup>+</sup> naive T cells

CD4<sup>+</sup> memory  
T cells

## mRRBS

Genomic  
DNA

MspI  
digestion

End repair,  
A-tailing  
and adapter  
ligation

Bisulfite  
conversion

PCR and  
library  
preparation

Sequencing  
on Hiseq  
2500 or  
3000

## Bioinformatic pipeline and statistical analyses

Annotation  
of DMP  
•CpGs and  
genes  
•RA risk  
genes  
•Gene  
ontology

Statistical  
comparison  
of  
methylation  
values  
(coverage  
≥10 and  
group size  
≥5)

Filtering out  
SNPs, sex  
chromo-  
somes and  
outlier  
samples

Quality  
control,  
alignment  
of reads,  
calling  
methylation  
values
